# Supplementary material for: PSMD8 can serve as potential biomarker and therapeutic target of the PSMD family in ovarian cancer: based on bioinformatics analysis and in vitro validation
Source: Springer Nature journal article supplement (doi:10.1186/s12885-023-11017-8), 2023-06-22
Supplement: MOESM1 [file 25525664]

# HIC-1

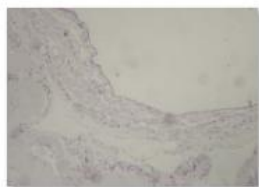

BENIGN10-LX-P  
SMD8.tif

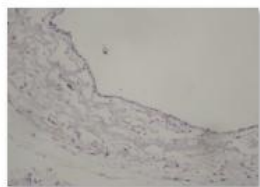

BENIGN20-LX-P  
SMD8.tif

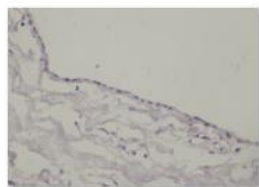

BENIGN-40-LX-  
PSMD8.tif

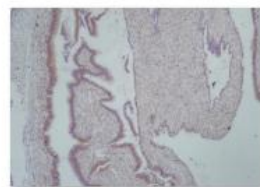

BORDER10-PS  
MD8.tif

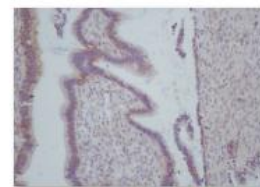

BORDER20-LX-  
PSMD8.tif

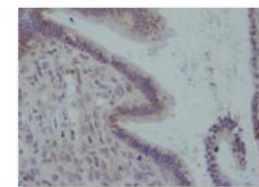

BORDER40-LX-  
PSMD8.tif

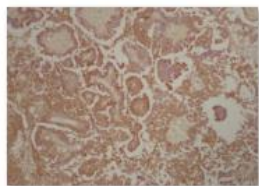

CANCER(10)1-1  
0-LX-PSMD8.tif

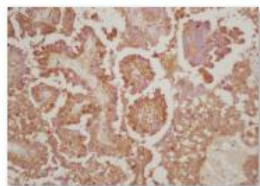

CANCER(20)1-2  
0-LX-PSMD8.tif

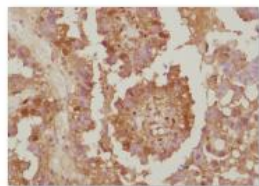

CANCER(40)1-4  
0-LX-PSMD8.tif

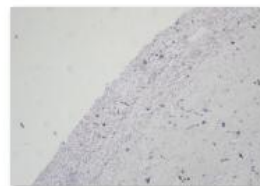

NORMAL10-LX-  
PSMD8.tif

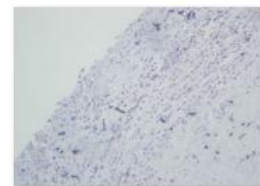

NORMAL20-LX-  
PSMD8.tif

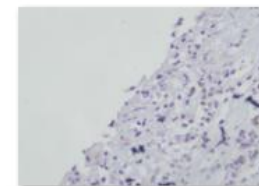

NORMAL40-LX-  
PSMD8.tif

# HIC-2

| NC | COLOR (0-3) | AREA (0-4) | SCOI | Gro | FIG  | FIG | Gra | Lymphnc | ag | Ag | Survival t | Dea | Tim |  |  |  |
|----|-------------|------------|------|-----|------|-----|-----|---------|----|----|------------|-----|-----|--|--|--|
|    | 3           | 3          | 9    | 2   | IIIc | 2   | 2   | 2       | 54 | 1  | death: 14  | 1   | 14  |  |  |  |
|    | 3           | 3          | 9    | 2   | IV   | 2   | 2   | 2       | 51 | 1  | death: 12  | 1   | 12  |  |  |  |
|    | 3           | 2          | 6    | 2   | IIIc | 2   | 2   | 1       | 63 | 2  | death: 31  | 1   | 31  |  |  |  |
|    | 2           | 4          | 8    | 2   | IIIc | 2   | 2   | 2       | 62 | 2  | death: 36  | 1   | 36  |  |  |  |
|    | 0           | 4          | 0    | 2   | IIIc | 2   | 1   | 2       | 62 | 2  | death: 51  | 1   | 51  |  |  |  |
|    | 3           | 3          | 9    | 2   | IIIc | 2   | 1   | 2       | 48 | 1  | death: 49  | 1   | 49  |  |  |  |
|    | 2           | 3          | 6    | 2   | IIIc | 2   | 1   | 1       | 63 | 2  | death: 28  | 1   | 28  |  |  |  |
|    | 2           | 4          | 8    | 2   | IIIc | 2   | 2   | 1       | 63 | 2  | 24         | 1   | 24  |  |  |  |
|    | 2           | 4          | 8    | 2   | IIIc | 2   | 2   | 2       | 57 | 2  | 27         | 1   | 27  |  |  |  |
|    | 3           | 3          | 9    | 2   | IIIc | 2   | 2   | 2       | 71 | 2  | death: 36  | 1   | 36  |  |  |  |
|    | 3           | 3          | 9    | 2   | IIIc | 2   | 1   |         | 45 | 1  | death: 28  | 1   | 28  |  |  |  |
|    | 3           | 3          | 9    | 2   | IIIc | 2   | 2   |         | 77 | 2  | death: 36  | 1   | 36  |  |  |  |
|    | 3           | 3          | 9    | 2   | IIIc | 2   | 1   | 1       | 52 | 1  | death: 58  | 1   | 58  |  |  |  |
|    | 3           | 3          | 9    | 2   | IIIc | 2   | 1   |         | 64 | 2  | death: 45  | 1   | 45  |  |  |  |
|    | 3           | 3          | 9    | 2   | IIIc | 2   | 1   |         | 78 | 2  | death: 20  | 1   | 20  |  |  |  |
|    | 3           | 3          | 9    | 2   | IIIc | 2   | 2   | 2       | 28 | 1  | 26         | 1   | 26  |  |  |  |
|    | 2           | 3          | 6    | 2   | IIIc | 2   | 2   | 1       | 74 | 2  | death: 31  | 1   | 31  |  |  |  |
|    | 3           | 3          | 9    | 2   | III  | 2   | 1   |         | 53 | 1  | death: 41  | 1   | 41  |  |  |  |
|    | 2           | 4          | 8    | 2   | IIIc | 2   | 2   | 1       | 71 | 2  | death: 70  | 1   | 70  |  |  |  |
|    | 3           | 3          | 9    | 2   | IIIc | 2   | 2   | 2       | 43 | 1  | death: 8   | 1   | 8   |  |  |  |
|    | 3           | 3          | 9    | 2   | IIIc | 2   | 2   | 2       | 42 | 1  | death: 47  | 1   | 47  |  |  |  |
|    | 2           | 4          | 8    | 2   | IIIc | 2   | 2   | 1       | 46 | 1  | death: 36  | 1   | 36  |  |  |  |
|    | 3           | 3          | 9    | 2   | IIIc | 2   | 2   |         | 51 | 1  | loss       | 0   |     |  |  |  |
|    | 0           | 4          | 0    | 2   | IIIc | 2   | 2   | 2       | 59 | 2  | loss       | 0   |     |  |  |  |
|    | 2           | 3          | 6    | 2   | IIIc | 2   | 2   | 2       | 60 | 2  | loss       | 0   |     |  |  |  |
|    | 2           | 3          | 6    | 2   | IIIc | 2   | 2   | 1       | 55 | 2  | 70         | 0   | 70  |  |  |  |
|    | 3           | 2          | 6    | 2   | IIIc | 2   | 2   | 1       | 58 | 2  | 34         | 0   | 34  |  |  |  |
|    | 3           | 2          | 6    | 2   | IIIc | 2   | 2   | 1       | 49 | 1  | 78         | 0   | 78  |  |  |  |
|    | 2           | 3          | 6    | 2   | IIIc | 2   | 2   |         | 53 | 1  | loss       | 0   |     |  |  |  |
|    | 3           | 2          | 6    | 2   | IIIc | 2   | 2   |         | 71 | 2  | loss       | 0   |     |  |  |  |
|    | 2           | 3          | 6    | 2   | IIIc | 2   | 2   | 1       | 52 | 1  | 43         | 0   | 43  |  |  |  |
|    | 2           | 3          | 6    | 2   | IIIc | 2   | 2   | 2       | 39 | 1  | 36         | 0   | 36  |  |  |  |
|    | 2           | 3          | 6    | 2   | IIIc | 2   | 2   | 2       | 54 | 1  | 44         | 0   | 44  |  |  |  |
|    | 3           | 2          | 6    | 2   | IIIc | 2   | 2   | 2       | 42 | 1  | 34         | 0   | 34  |  |  |  |
|    | 2           | 4          | 8    | 2   | IIIc | 2   | 1   | 1       | 38 | 1  | loss       | 0   |     |  |  |  |
|    | 3           | 3          | 9    | 2   | IIIc | 2   | 2   | 2       | 62 | 2  | 39         | 0   | 39  |  |  |  |
|    | 3           | 3          | 9    | 2   | IIIc | 2   | 2   | 2       | 50 | 1  | 32         | 0   | 32  |  |  |  |
|    | 3           | 3          | 9    | 2   | IIIc | 2   | 2   | 1       | 48 | 1  | loss       | 0   |     |  |  |  |
|    | 3           | 3          | 9    | 2   | IIIc | 2   | 2   | 2       | 51 | 1  | 43         | 0   | 43  |  |  |  |

# HIC-3

| A  | B           | C          | D    | E   | F    | G   | H   | I       | J  | K  | L          | M   | N   | O |
|----|-------------|------------|------|-----|------|-----|-----|---------|----|----|------------|-----|-----|---|
| NC | COLOR (0-3) | AREA (0-4) | SCOl | Gro | FIG  | FIG | Gra | Lymphnc | ag | Ag | Survival t | Dea | Tim |   |
|    | 3           | 3          | 9    | 2   | IIIc | 2   | 2   | 2       | 51 | 1  | 43         | 0   | 43  |   |
|    | 3           | 3          | 9    | 2   | IIIc | 2   | 2   | 2       | 49 | 1  | loss       | 0   |     |   |
|    | 3           | 4          | 12   | 2   | IIIc | 2   | 2   |         | 48 | 1  | 43         | 0   | 43  |   |
|    | 2           | 3          | 6    | 2   | IIIc | 2   | 2   |         | 49 | 1  | 63         | 0   | 63  |   |
|    | 2           | 2          | 4    | 1   | III  | 2   | 2   | 1       | 52 | 1  | death : 23 | 1   | 23  |   |
|    | 2           | 2          | 4    | 1   | IIIc | 2   | 1   |         | 55 | 2  | death : 77 | 1   | 77  |   |
|    | 2           | 2          | 4    | 1   | IIIb | 2   | 2   | 1       | 43 | 1  | loss       | 0   |     |   |
|    | 2           | 2          | 4    | 1   | IV   | 2   | 2   | 2       | 57 | 2  | 79         | 0   | 79  |   |
|    | 1           | 4          | 4    | 1   | IIIb | 2   | 1   | 2       | 46 | 1  | 104        | 0   | 104 |   |
|    | 1           | 3          | 3    | 1   | IV   | 2   | 2   | 2       | 53 | 1  | 32         | 1   | 32  |   |
|    | 2           | 1          | 2    | 1   | IIIc | 2   | 1   | 1       | 69 | 2  | 46         | 0   | 46  |   |
|    | 1           | 3          | 3    | 1   | IIIc | 2   | 2   | 2       | 58 | 2  | 37         | 0   | 37  |   |
|    | 2           | 2          | 4    | 1   | IIIc | 2   | 1   | 1       | 69 | 2  | 121        | 1   | 121 |   |
|    | 2           | 2          | 4    | 1   | IIIc | 2   | 1   | 1       | 55 | 2  | 106        | 0   | 106 |   |
|    | 2           | 2          | 4    | 1   | IIIc | 2   | 2   | 2       | 40 | 1  | 44         | 1   | 44  |   |
|    | 2           | 1          | 2    | 1   | IV   | 2   | 2   | 2       | 49 | 1  | 90         | 0   | 90  |   |
|    | 3           | 4          | 12   | 2   | IA   | 1   | 1   | 1       | 64 | 2  | 69         | 0   | 69  |   |
|    | 2           | 4          | 8    | 2   | Ib   | 1   | 1   |         | 70 | 2  | 72         | 0   | 72  |   |
|    | 3           | 3          | 9    | 2   | Ila  | 1   | 1   | 1       | 62 | 2  | loss       | 0   |     |   |
|    | 3           | 2          | 6    | 2   | II   | 1   | 1   | 1       | 60 | 2  | loss       | 0   |     |   |
|    | 2           | 4          | 8    | 2   | Ic   | 1   | 1   | 1       | 55 | 2  | 62         | 0   | 62  |   |
|    | 2           | 4          | 8    | 2   | I    | 1   | 2   | 1       | 48 | 1  | 75         | 0   | 75  |   |
|    | 3           | 3          | 9    | 2   | Ia   | 1   | 1   | 1       | 74 | 2  | 67         | 0   | 67  |   |
|    | 0           | 4          | 0    | 2   | Ic   | 1   | 1   |         | 32 | 1  | 27         | 1   | 27  |   |
|    | 2           | 2          | 4    | 1   | IIb  | 1   | 2   | 1       | 54 | 1  | death : 45 | 1   | 45  |   |
|    | 2           | 2          | 4    | 1   | IIc  | 1   | 2   | 1       | 74 | 2  | 66         | 0   | 66  |   |
|    | 2           | 1          | 2    | 1   | I c  | 1   | 2   | 1       | 53 | 1  | 123        | 1   | 123 |   |
|    | 0           | 3          | 0    | 1   | Ia   | 1   | 2   | 1       | 51 | 1  | 111        | 0   | 111 |   |
|    | 2           | 1          | 2    | 1   | Ia   | 1   | 1   | 1       | 58 | 2  | 100        | 1   | 100 |   |
|    | 2           | 2          | 4    | 1   | Ia   | 1   | 1   | 1       | 40 | 1  | loss       | 0   |     |   |
|    | 2           | 1          | 2    | 1   | IA   | 1   | 1   | 1       | 35 | 1  | 43         | 1   | 43  |   |
|    | 1           | 4          | 4    | 1   | Ic   | 1   | 2   | 1       | 47 | 1  | 83         | 0   | 83  |   |
|    | 1           | 3          | 3    | 1   | Ic   | 1   | 1   | 1       | 45 | 1  | loss       | 0   |     |   |
|    | 0           | 4          | 0    | 1   | Ic   | 1   | 2   |         | 63 | 2  | 85         | 0   | 85  |   |
|    | 2           | 2          | 4    | 1   | IIA  | 1   | 2   | 1       | 65 | 2  | 32         | 1   | 32  |   |
|    | 2           | 2          | 4    | 1   | IIc  | 1   | 1   | 1       | 54 | 1  | loss       | 0   |     |   |
|    | 2           | 1          | 2    | 1   | Ib   | 1   | 2   | 1       | 56 | 2  | 49         | 1   | 79  |   |
|    | 0           | 4          | 0    | 1   | Ic   | 1   | 1   | 1       | 58 | 2  | 46         | 1   | 46  |   |
|    | 2           | 1          | 2    | 1   | Ic   | 1   | 1   | 1       | 61 | 2  | 86         | 0   | 86  |   |
|    | 2           | 2          | 4    | 1   | I    | 1   | 1   | 1       | 74 | 2  | 58         | 0   | 58  |   |
|    | 2           | 2          | 4    | 1   | I    | 1   | 2   | 1       | 44 | 1  | 76         | 1   | 76  |   |
| 42 | 2           | 2          | 4    | 1   | Ic   | 1   | 1   | 1       | 52 | 1  | loss       | 0   |     |   |

# MTT-1

|            |       |       |       |       |       |       |       |       |       |       |
|------------|-------|-------|-------|-------|-------|-------|-------|-------|-------|-------|
|            |       |       |       |       |       |       |       |       |       |       |
| OVCAR3     | 0.196 | 0.13  | 0.188 | 0.196 | 0.211 | 0.219 | 0.213 | 0.209 | 0.223 | 0.215 |
| OVCAR3-L-1 | 0.222 | 0.208 | 0.199 | 0.206 | 0.209 | 0.214 | 0.21  | 0.204 | 0.212 | 0.22  |
| OVCAR3-L-2 | 0.206 | 0.215 | 0.213 | 0.208 | 0.211 | 0.214 | 0.212 | 0.197 | 0.193 | 0.211 |
|            |       |       |       |       |       |       |       |       |       |       |
|            |       |       |       |       |       |       |       |       |       |       |
| OVCAR3     | 0.39  | 0.385 | 0.374 | 0.371 | 0.373 | 0.371 | 0.385 | 0.395 | 0.393 | 0.397 |
| OVCAR3-L-1 | 0.465 | 0.416 | 0.423 | 0.407 | 0.426 | 0.43  | 0.429 | 0.427 | 0.404 | 0.451 |
| OVCAR3-L-2 | 0.36  | 0.405 | 0.374 | 0.379 | 0.377 | 0.384 | 0.379 | 0.389 | 0.408 | 0.427 |
|            |       |       |       |       |       |       |       |       |       |       |
|            |       |       |       |       |       |       |       |       |       |       |
| OVCAR3     | 0.563 | 0.522 | 0.507 | 0.528 | 0.527 | 0.522 | 0.52  | 0.544 | 0.525 | 0.534 |
| OVCAR3-L-1 | 0.664 | 0.643 | 0.655 | 0.654 | 0.644 | 0.637 | 0.625 | 0.691 | 0.635 | 0.713 |
| OVCAR3-L-2 | 0.434 | 0.471 | 0.449 | 0.475 | 0.473 | 0.483 | 0.461 | 0.496 | 0.51  | 0.511 |
|            |       |       |       |       |       |       |       |       |       |       |
|            |       |       |       |       |       |       |       |       |       |       |
| OVCAR3     | 0.714 | 0.692 | 0.654 | 0.712 | 0.697 | 0.7   | 0.7   | 0.699 | 0.701 | 0.7   |
| OVCAR3-L-1 | 1.144 | 1.074 | 0.99  | 1.033 | 1.075 | 1.06  | 1.076 | 1.089 | 1.06  | 1.001 |
| OVCAR3-L-2 | 0.671 | 0.571 | 0.608 | 0.649 | 0.696 | 0.715 | 0.675 | 0.577 | 0.674 | 0.658 |
|            |       |       |       |       |       |       |       |       |       |       |
|            |       |       |       |       |       |       |       |       |       |       |
| OVCAR3     | 0.838 | 0.818 | 0.839 | 0.816 | 0.819 | 0.829 | 0.847 | 0.809 | 0.812 | 0.841 |
| OVCAR3-L-1 | 1.053 | 1.059 | 1.081 | 1.05  | 1.092 | 1.077 | 1.077 | 1.072 | 1.051 | 1.117 |
| OVCAR3-L-2 | 0.756 | 0.77  | 0.721 | 0.684 | 0.725 | 0.738 | 0.744 | 0.753 | 0.747 | 0.797 |
|            |       |       |       |       |       |       |       |       |       |       |
|            |       |       |       |       |       |       |       |       |       |       |
| OVCAR3     | 0.788 | 0.681 | 0.713 | 0.71  | 0.744 | 0.772 | 0.799 | 0.734 | 0.73  | 0.805 |

|           |       |       |       |       |       |       |       |       |       |       |
|-----------|-------|-------|-------|-------|-------|-------|-------|-------|-------|-------|
| A2780     | 0.148 | 0.16  | 0.148 | 0.161 | 0.155 | 0.162 | 0.153 | 0.164 | 0.161 | 0.167 |
| A2780-L-1 | 0.153 | 0.151 | 0.148 | 0.163 | 0.152 | 0.154 | 0.15  | 0.147 | 0.146 | 0.148 |
| A2780-L-2 | 0.153 | 0.165 | 0.166 | 0.159 | 0.163 | 0.17  | 0.162 | 0.164 | 0.163 | 0.168 |
|           |       |       |       |       |       |       |       |       |       |       |
|           |       |       |       |       |       |       |       |       |       |       |
| A2780     | 0.325 | 0.313 | 0.315 | 0.308 | 0.31  | 0.307 | 0.3   | 0.281 | 0.313 | 0.346 |
| A2780-L-1 | 0.26  | 0.217 | 0.211 | 0.253 | 0.237 | 0.243 | 0.225 | 0.236 | 0.252 | 0.25  |
| A2780-L-2 | 0.208 | 0.227 | 0.234 | 0.22  | 0.213 | 0.223 | 0.226 | 0.22  | 0.225 | 0.209 |
|           |       |       |       |       |       |       |       |       |       |       |
|           |       |       |       |       |       |       |       |       |       |       |
| A2780     | 0.884 | 0.775 | 0.716 | 0.69  | 0.785 | 0.722 | 0.779 | 0.804 | 0.798 | 0.799 |
| A2780-L-1 | 0.547 | 0.545 | 0.468 | 0.47  | 0.499 | 0.539 | 0.554 | 0.53  | 0.517 | 0.556 |
| A2780-L-2 | 0.557 | 0.54  | 0.455 | 0.538 | 0.502 | 0.524 | 0.518 | 0.504 | 0.544 | 0.601 |
|           |       |       |       |       |       |       |       |       |       |       |
|           |       |       |       |       |       |       |       |       |       |       |
| A2780     | 0.908 | 0.93  | 0.954 | 0.931 | 0.95  | 0.981 | 0.936 | 0.946 | 0.935 | 0.955 |
| A2780-L-1 | 0.645 | 0.661 | 0.613 | 0.582 | 0.618 | 0.619 | 0.634 | 0.643 | 0.628 | 0.677 |
| A2780-L-2 | 0.673 | 0.585 | 0.624 | 0.6   | 0.628 | 0.646 | 0.668 | 0.628 | 0.621 | 0.675 |
|           |       |       |       |       |       |       |       |       |       |       |
|           |       |       |       |       |       |       |       |       |       |       |
| A2780     | 1.233 | 1.234 | 1.281 | 1.26  | 1.274 | 1.218 | 1.244 | 1.261 | 1.244 | 1.267 |
| A2780-L-1 | 0.887 | 0.912 | 0.859 | 0.861 | 0.842 | 0.853 | 0.894 | 0.891 | 0.889 | 0.932 |
| A2780-L-2 | 0.9   | 0.804 | 0.848 | 0.837 | 0.828 | 0.861 | 0.884 | 0.845 | 0.835 | 0.845 |
